# Supplementary material
Source: Springer Nature journal article supplement (https://www.springermedizin.de/resource/supplementary/13048_2013_220_MOESM5_ESM.pdf/9665226)

**A**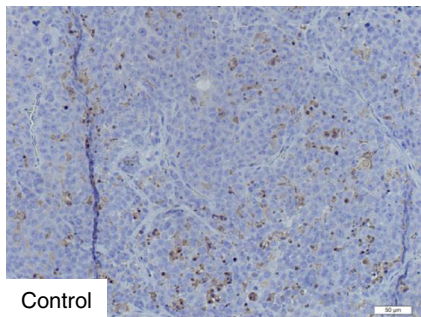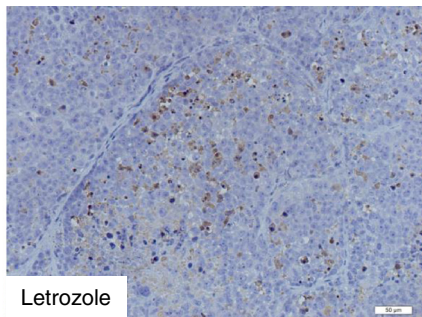**B**

KDa

20.1

Control

Letrozole

Caspase-3

14.3

 $\beta$ actin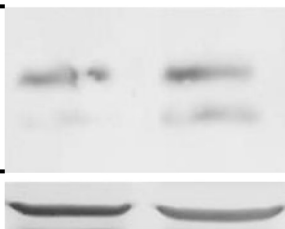

Supplement: MOESM5 [file 9665226]
